# Supplementary material
Source: PubMed Central journal article supplement (PMC6668026)
Supplement: NIHMS1037194-supplement-suppl.pdf [file NIHMS1037194-supplement-suppl.pdf]

**Intracortical smoothing of small-voxel fMRI data can provide increased detection power without spatial resolution losses compared to conventional large-voxel fMRI data**

Anna I Blazejewska<sup>1,2,\*</sup>, Bruce Fischl<sup>1,2,3</sup>, Lawrence L. Wald<sup>1,2,4</sup>, and Jonathan R. Polimeni<sup>1,2,4</sup>

1: Athinoula A. Martinos Center for Biomedical Imaging, Massachusetts General Hospital, Charlestown, Boston, MA, USA

2: Department of Radiology, Harvard Medical School, Boston, MA, USA

3: Computer Science and Artificial Intelligence Laboratory, Massachusetts Institute of Technology, Cambridge, MA, USA

4: Harvard-MIT Division of Health Sciences and Technology, Massachusetts Institute of Technology, Cambridge, MA, United States

\*Correspondence should be directed to:

Anna Blazejewska, Ph.D.

MGH/HST Athinoula A. Martinos Center for Biomedical Imaging

Bldg 149 13<sup>th</sup> St Rm 2301

Charlestown MA, 02129 USA

Tel: +1 617 724-4546

Fax: +1 617 726-7422

E-mail address: [ABLAZEJEWSKA@mgh.harvard.edu](mailto:ABLAZEJEWSKA@mgh.harvard.edu)

2 **Supplementary Figure captions**

3

4 **Supplementary Fig. 1.** Illustration of the process of selecting kernel sizes that achieve a desired smoothing  
5 capacity. A simulated dataset consisting of 100 time-points of synthetic white noise (zero mean, unit  
6 variance) in 1.1 mm isotropic resolution was smoothed with kernels of different shapes and sizes,  
7 including volume-based and surface-based, and the resulting temporal standard deviation values (tSTD)  
8 were used to determine kernels of corresponding smoothing capacity. (a) The dashed line represents the  
9 best-fitting sigmoidal function to the tSTD values across smoothing kernels that was used to interpolate  
10 between points; the values of the coefficients of this sigmoid function are provided in the top right corner.  
11 The black line and gray shading represent a range of volume smoothing kernels with FWHM between 2.0  
12 and 1.9 mm which, using the sigmoid interpolation function, determines a range of corresponding tSTD  
13 values marked with blue shading. A tangential kernel with NB=5, marked with a black circle, has  
14 comparable smoothing capacity (tSTD value) to a volume-smoothing kernel with FWHM=2.0 mm. (b)  
15 Selected intracortical kernels (from a discrete set of radii) of smoothing capacity comparable to a volume  
16 smoothing of FWHM=2.0 mm or slightly smaller. The radial extent of the intracortical kernels is indicated  
17 by the color-coded points (blue-to-cyan and red-to-yellow) and a legend is provided at the top of each  
18 plot; the gray shading represents a range of volume-smoothing kernels with FWHM between 2.0 and 1.8  
19 mm. For each radial extent one intracortical kernel is selected based on its correspondence to the volume-  
20 smoothing kernels from this range, and it is marked with a circle.

21

22 **Supplementary Fig. 2.** Example sagittal slice and axial and coronal reformats of intensity bias-corrected  
23 0.75 mm isotropic resolution anatomical T<sub>1</sub>-weighted MEMPRAGE data with cross-sections of cortical  
24 surface reconstructions overlaid: the *yellow contour* represents the white matter surface and the *red*  
25 *contour* represents the pial surface. Small errors can be seen in the vicinity of the temporal pole and the  
26 orbitofrontal cortex, as previously reported for similar 7T MEMPRAGE data (Zaretskaya et al., 2018),  
27 however overall the automatic surface reconstruction quality is high across most of the hemispheres.

28

29 **Supplementary Fig. 3.** Example histograms of vertex spacing (average distance between any given vertex  
30 and its immediate neighbors) calculated separately for gyri, sulci and banks, for the white matter surface  
31 mesh and for the pial surface mesh, of the left hemisphere of one subject. To consistently identify gyri,  
32 sulci and banks between the white and pial surfaces, the gyri, sulci and banks were defined based on the

33 curvature of the midgray surface (50% of the depth) using thresholds of 0.25 and  $-0.25 \text{ mm}^{-1}$  (where  
34 curvature values fell into the  $[-1, 1]$  range).

35

36 **Supplementary Fig. 4.** tSNR values (averaged across 5 subjects) calculated for 1.1-mm isotropic resting-  
37 state fMRI data after smoothing with a set of kernels with equivalent smoothing capacities. For  
38 comparison, the resulting tSNR was normalized to reference tSNR of conventional volume-based  
39 smoothed data using a 3D kernel with FWHM=2.0 mm sampled at midgray depth. The reference tSNR of  
40 the volume-smoothed data, represented by the gray bar, is compared with the tSNR after applying a set  
41 of surface-based smoothing kernels with smoothing capacity matched to the FWHM=2.0 mm volume-  
42 smoothing kernel: a purely tangential kernel with NB=5 (radius $\approx$ 3.3 mm, cyan bar) where the resulting  
43 tSNR values were averaged across depths, and with intracortical kernels with varying tangential  
44 neighborhoods (blue and red bars) including: one extending across all depths (IC-all: 00–10), five  
45 extending from the WM to one of the intermediate depths (IC-wm: 00–08, 00–06, 00–04, 00–02, 00), and  
46 five centered at midgray depth and extending symmetrically in both directions (IC-mid: 01–09, 02–08, 03–  
47 07, 04–06, 05). Kernels IC-wm 00 and IC-mid 05 represent extreme cases consisting of only one cortical  
48 surface. Normalized tSNR of non-smoothed 3.0-mm isotropic data was plotted for comparison (white bar).  
49 Error bars indicate standard error across subjects.

50

51 **Supplementary Fig. 5.** Normalized z-statistic values (averaged across 5 subjects) calculated for 1.1-mm  
52 isotropic BH task fMRI data after smoothing with a set of kernels with equivalent smoothing capacities.  
53 The z-statistic values in each subject were first normalized to the z-statistic resulting from conventional  
54 volume-based smoothed data using a 3D kernel with FWHM=2.0 mm sampled at midgray depth, then  
55 averaged across subjects. The z-statistic of the reference volume-smoothed data, represented by the gray  
56 bar, is compared with the z-statistic after applying a set of surface-based smoothing kernels with  
57 equivalent smoothing capacity including: a purely tangential kernel with NB=5 (radius $\approx$ 3.3 mm, cyan bar)  
58 where the resulting z-statistic values were averaged across depths, and with intracortical kernels with  
59 varying tangential neighborhoods (red bars) including: one extending across all depths (IC-all: 00–10), five  
60 extending from the WM to one of the intermediate depths (IC-wm: 00–08, 00–06, 00–04, 00–02, 00), and  
61 five centered at midgray depth and extending symmetrically in both directions (IC-mid: 01–09, 02–08, 03–  
62 07, 04–06, 05). Kernels IC-wm 00 and IC-mid 05 represent extreme cases consisting of only one cortical  
63 surface. Normalized z-statistic of non-smoothed 3.0-mm isotropic data was plotted for comparison (white  
64 bar). Error bars indicate standard error across subjects.

65

66 **Supplementary Fig. 6.** A two-dimensional histogram presenting the dependence on cortical thickness of  
67 the tSNR gain (ratio) calculated for 1.1 mm isotropic resolution data smoothed with surface-based kernel  
68 IC-mid 03–07 NB=4 relative to the same non-smoothed 1.1 mm data (c.f. Fig. 6). The color scale is  
69 logarithmic and represents the number of vertices falling into a given bin, and bins have been set to  
70 correspond to every 0.5 mm of the cortical thickness and every 1 unit of tSNR ratio. Black contour overlays  
71 represent a two-dimensional Gaussian function resulting from fitting a mixture of two Gaussians to the  
72 value pairs across all vertices (estimated mixing proportion of 90%) and correspond to values from 0.05  
73 to 0.25, equally spaced every 0.05.

74

75 **Supplementary Fig. 7.** Visualization of the spatial distribution of z-statistic averaged across subjects using  
76 the FreeSurfer CVS avg35 atlas space, shown on the inflated surface representation for breath-hold data.  
77 **(a)** Normalized z-statistic of the non-smoothed 3.0-mm isotropic resolution data and the 1.1-mm isotropic  
78 resolution data after smoothing with surface-based kernel IC-mid 03–07 NB=4. **(b)** z-statistic gain  
79 (difference) map showing the functional CNR increase seen in the smoothed 1.1-mm isotropic resolution  
80 data using the same kernel from panel (a).

81

82 **Supplementary Fig. 8.** Comparison of tSNR values calculated for ultra-high-resolution 0.8-mm isotropic  
83 resting-state fMRI data acquired for one subject, based on an oblique-coronal acquisition centered on the  
84 occipital lobe, after smoothing with a set of kernels with equivalent smoothing capacities: proposed *3D*  
85 *intracortical smoothing* or IC-mid 03–07/NB=4 (dark blue), *conventional 2D tangential smoothing* or IC-  
86 *wm 00/NB=5* (red), and *midgray 2D tangential smoothing* or IC-mid 05/NB=5 (light blue). The tSNR values  
87 were normalized to reference tSNR of the conventional 2D surface-based smoothed data (equivalent to  
88 the 00/NB=5 kernel, red bar); the tSNR calculated for the original (non-smoothed) data is presented for  
89 comparison (yellow bar).

90

91 **Supplementary Fig. 9.** Comparison of smoothing applied to a retinotopic “test pattern” visual stimulus  
92 and resulting fMRI activation pattern. **(a)** The stimulus was designed to elicit a ‘diamond-shaped’  
93 activation on the cortical surface of V1 (left). To generate this activation pattern, the intended shape was  
94 warped according to a standard visuotopic mapping model and presented to the subject; in this case two  
95 orthogonal stimulus conditions corresponding to the “foreground” and “background” activation patterns  
96 (middle and right) were presented. **(b)** The resulting activation pattern, in the form of a map of z-statistic

97 values, showing the activation map resulting from the original non-smoothed data (left) and the activation  
98 maps resulting from smoothed with either a IC-mid 03–07/NB=1 kernel, which is restricted to the middle  
99 of the gray matter ribbon (middle), or a IC-mid 00–04/NB=1 kernel, which intersects with the white matter  
100 (right). All activation maps are visualized on the inflated representation of the cortical surface  
101 reconstruction.
